# Supplementary material for: A fluorescent probe for the selective detection of sulfate ions in water
Source: Royal Society of Chemistry journal article supplement (doi:10.1039/c3ra44220a), 2013-01-01
Supplement: c3ra44220a.pdf [file c3ra44220a.pdf]

## Supporting Information

### A fluorescent probe for the selective detection of sulfate ions in water

**Rajnish Saini and Subodh Kumar\***

**Corresponding author. Address:** Department of Chemistry, UGC Centre for Advanced Studies, Guru Nanak Dev University, Amritsar 143 005, India.

**Corresponding author. Mobile:** +91 9872361528.

**E-mail address:** [subodh\\_gndu@yahoo.co.in](mailto:subodh_gndu@yahoo.co.in)

#### Contents

|                                                                      | Pages |
|----------------------------------------------------------------------|-------|
| 1. $^1\text{H}$ NMR, $^{13}\text{C}$ NMR and HRMS Spectra of 1 and 2 | 2-6   |
| 2. UV-Vis and fluorescence studies                                   | 7-13  |
| 3. $^1\text{HNMR}$ analysis of 1 + $\text{SO}_4^{2-}$ complex        | 14    |
| 4. DFT optimized structures of 2 and 2- $\text{SO}_4^{2-}$           | 14    |

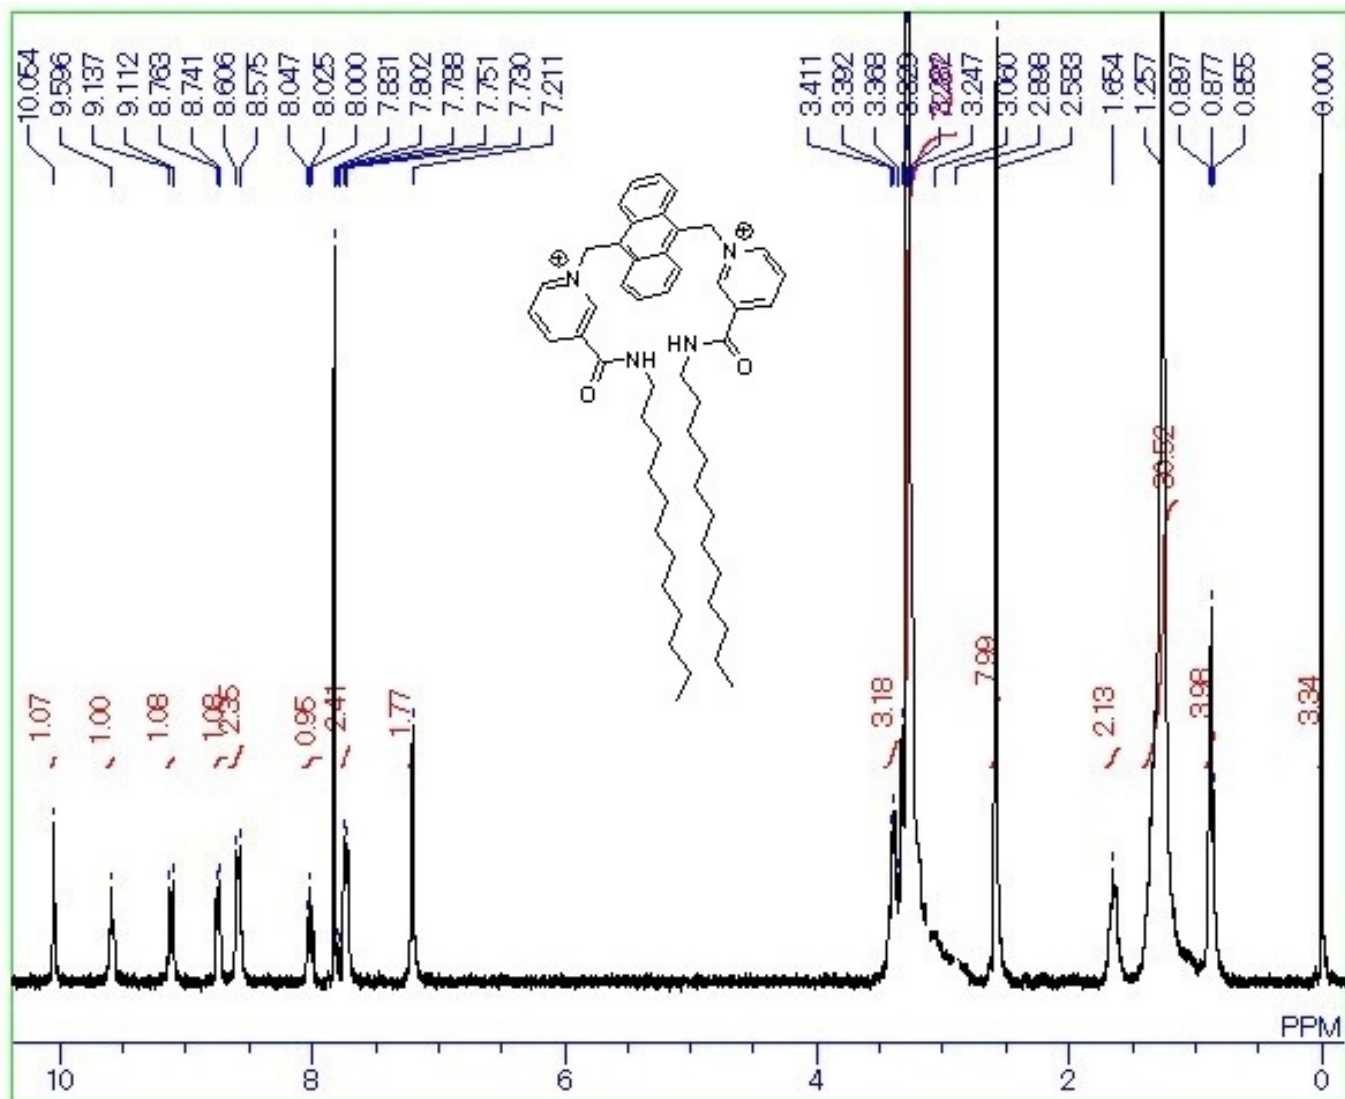

Figure S1.  $^1\text{H}$  NMR spectrum of probe 1.

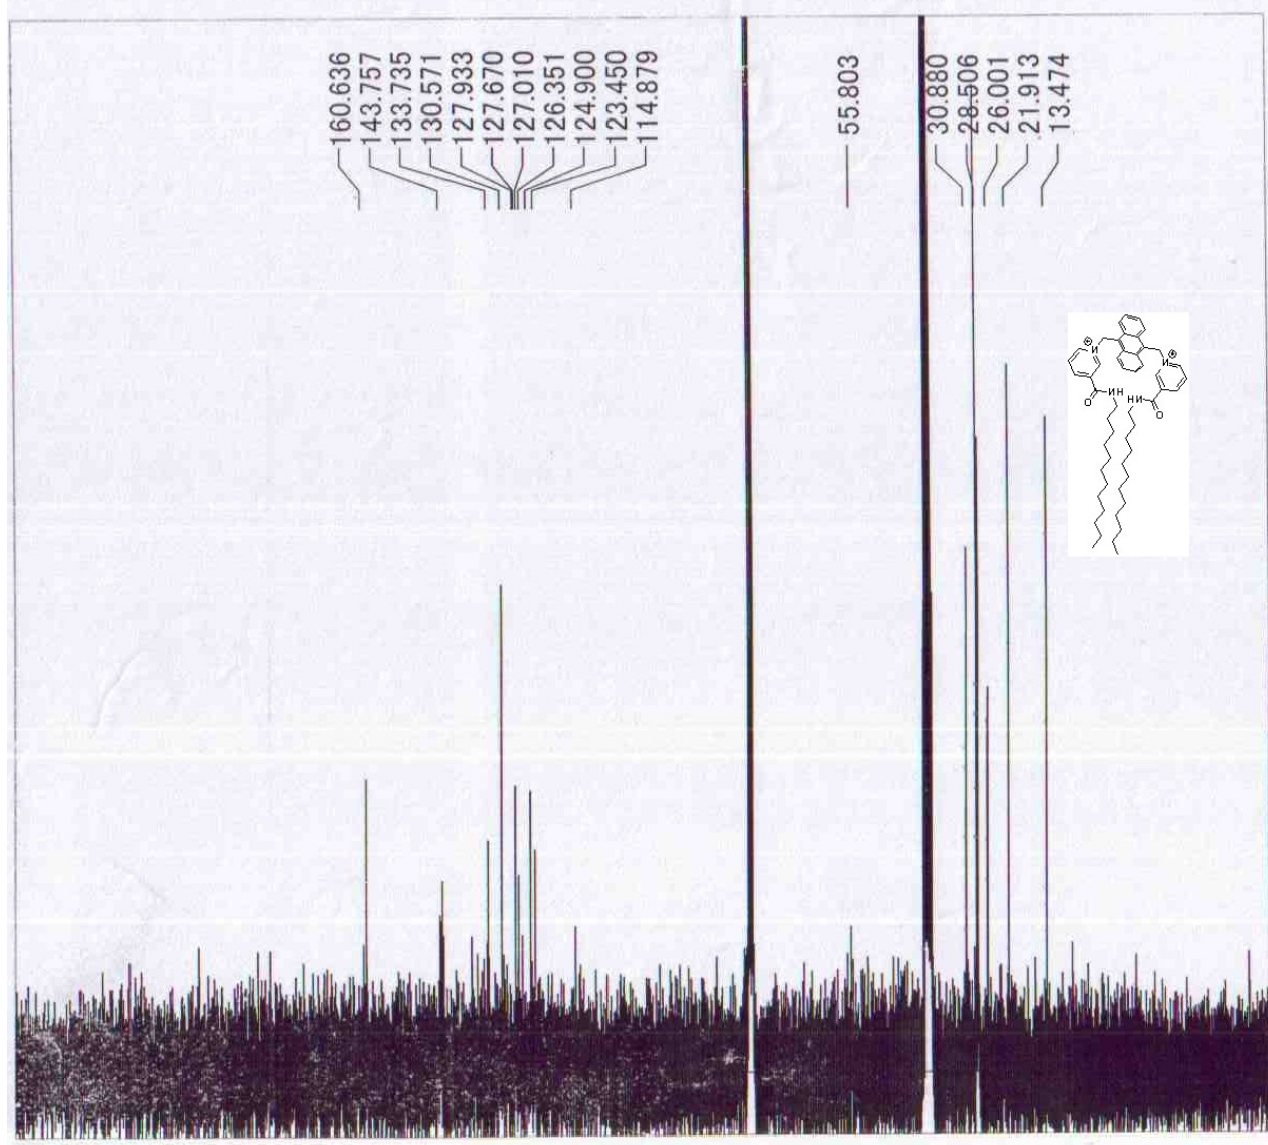

**Figure S2.**  $^{13}\text{C}$  NMR spectrum of probe 1.

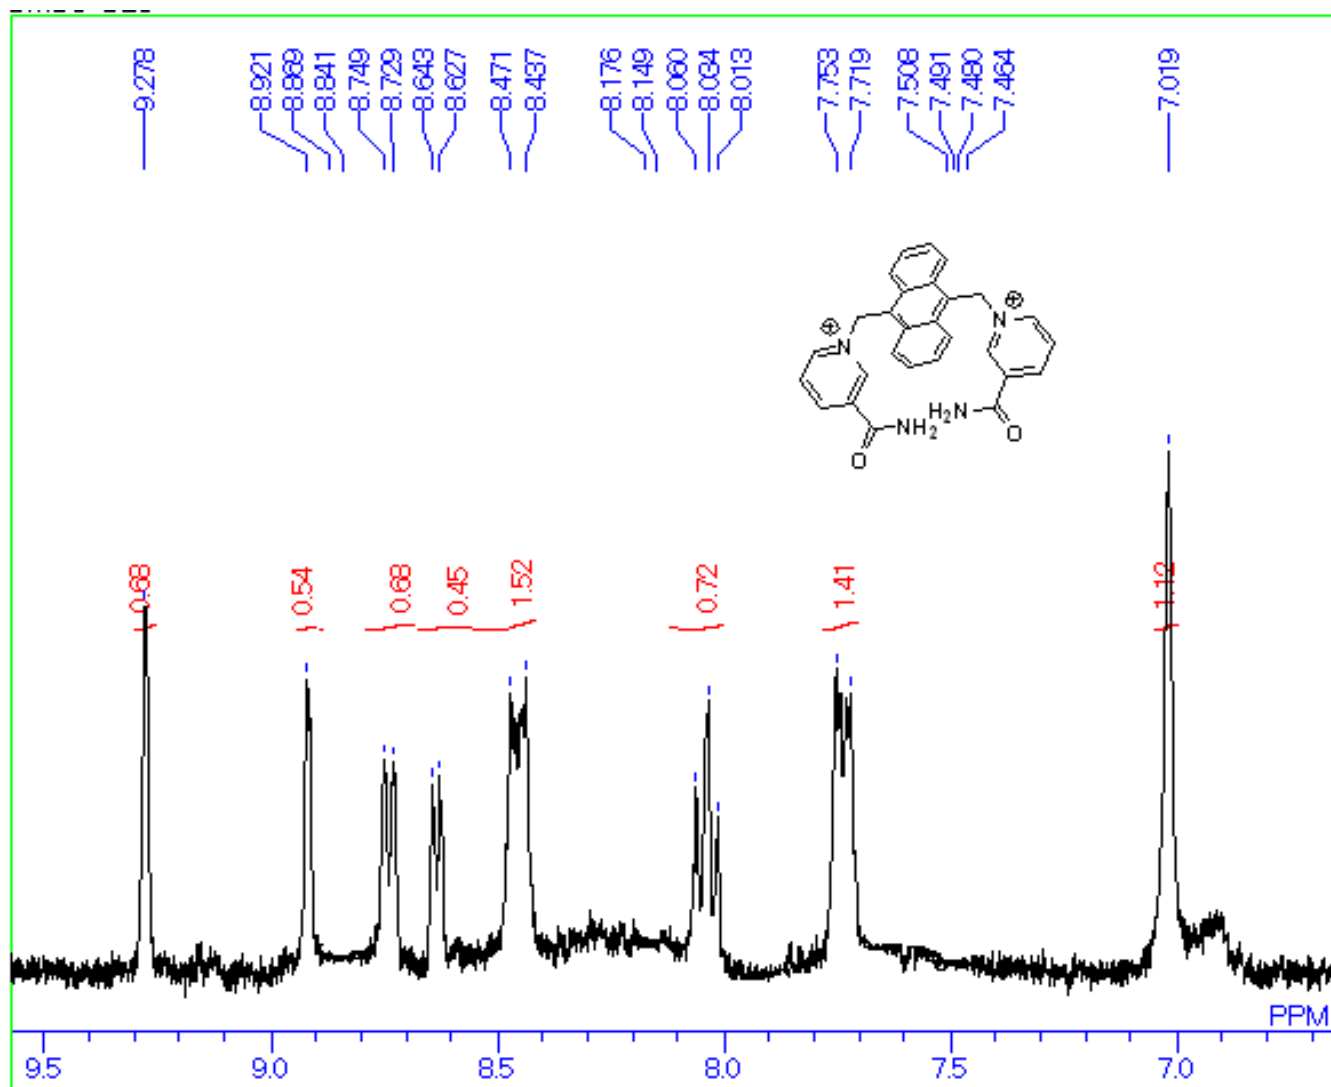

**Figure S3.** <sup>1</sup>H NMR spectrum of probe 2.

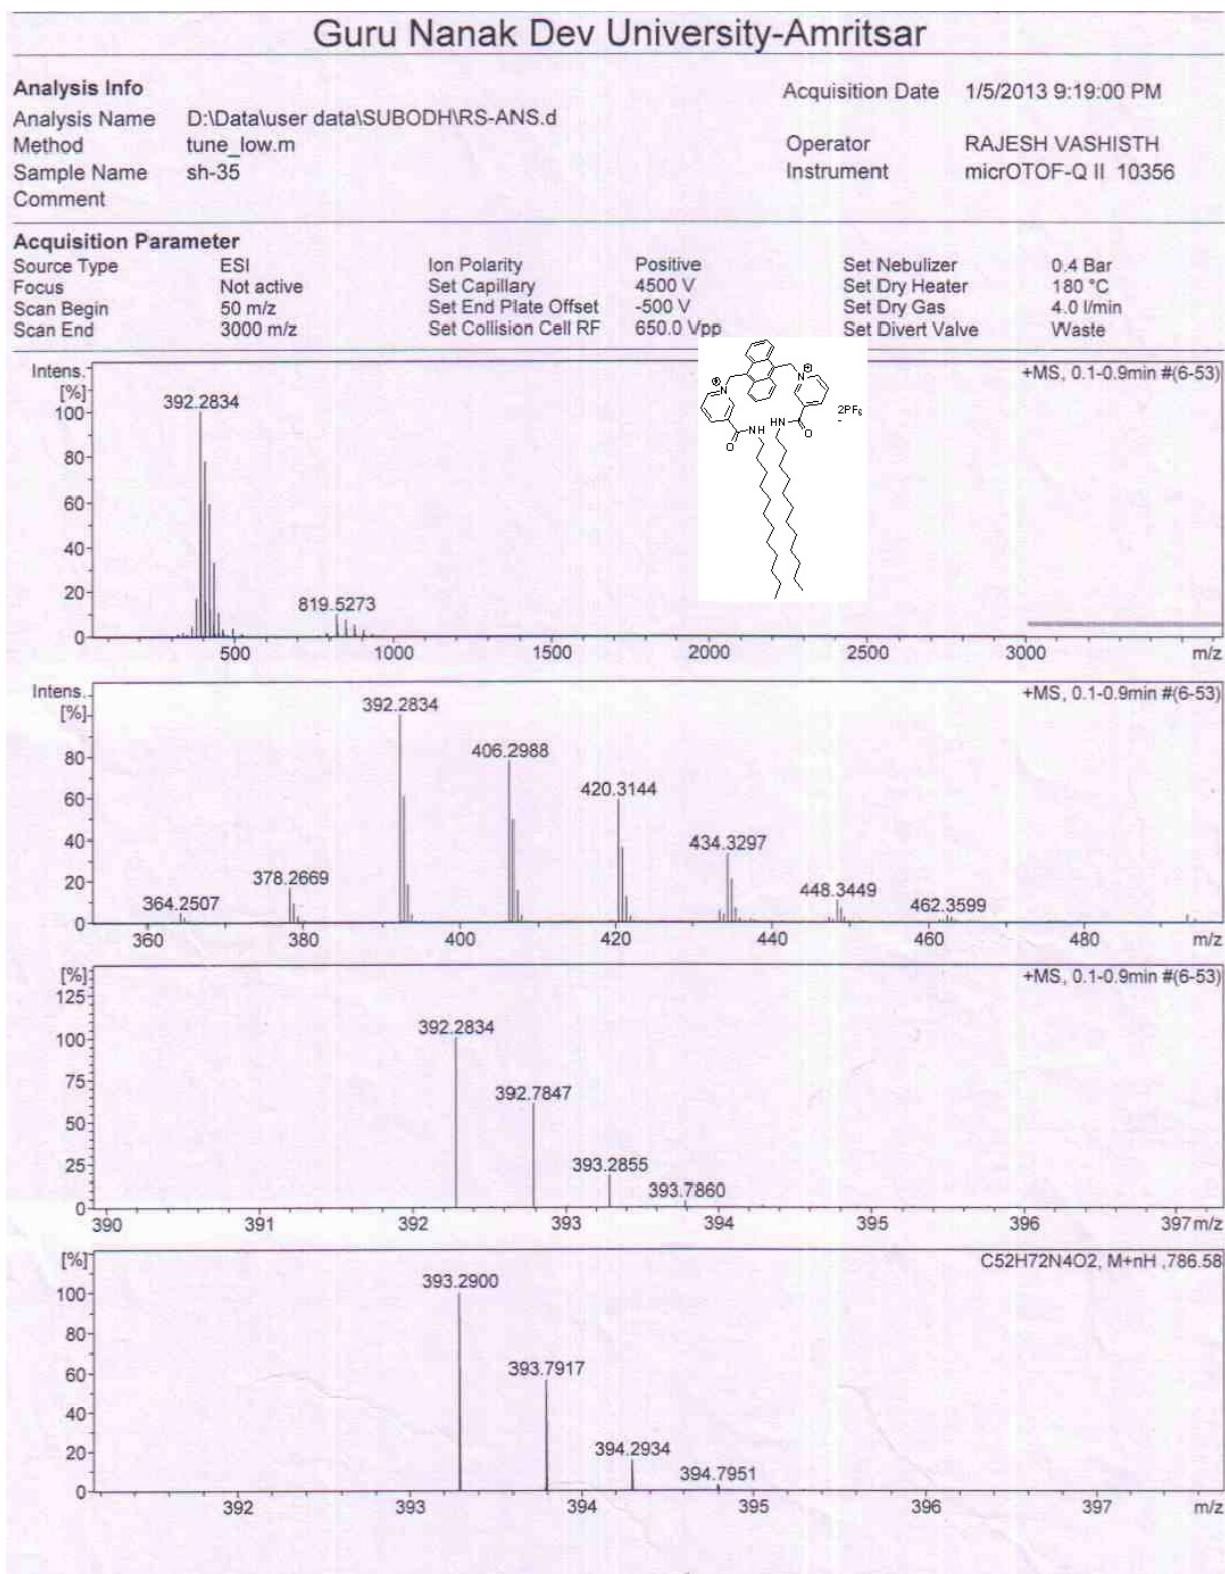

**Figure S4.** HRMS of probe 1.

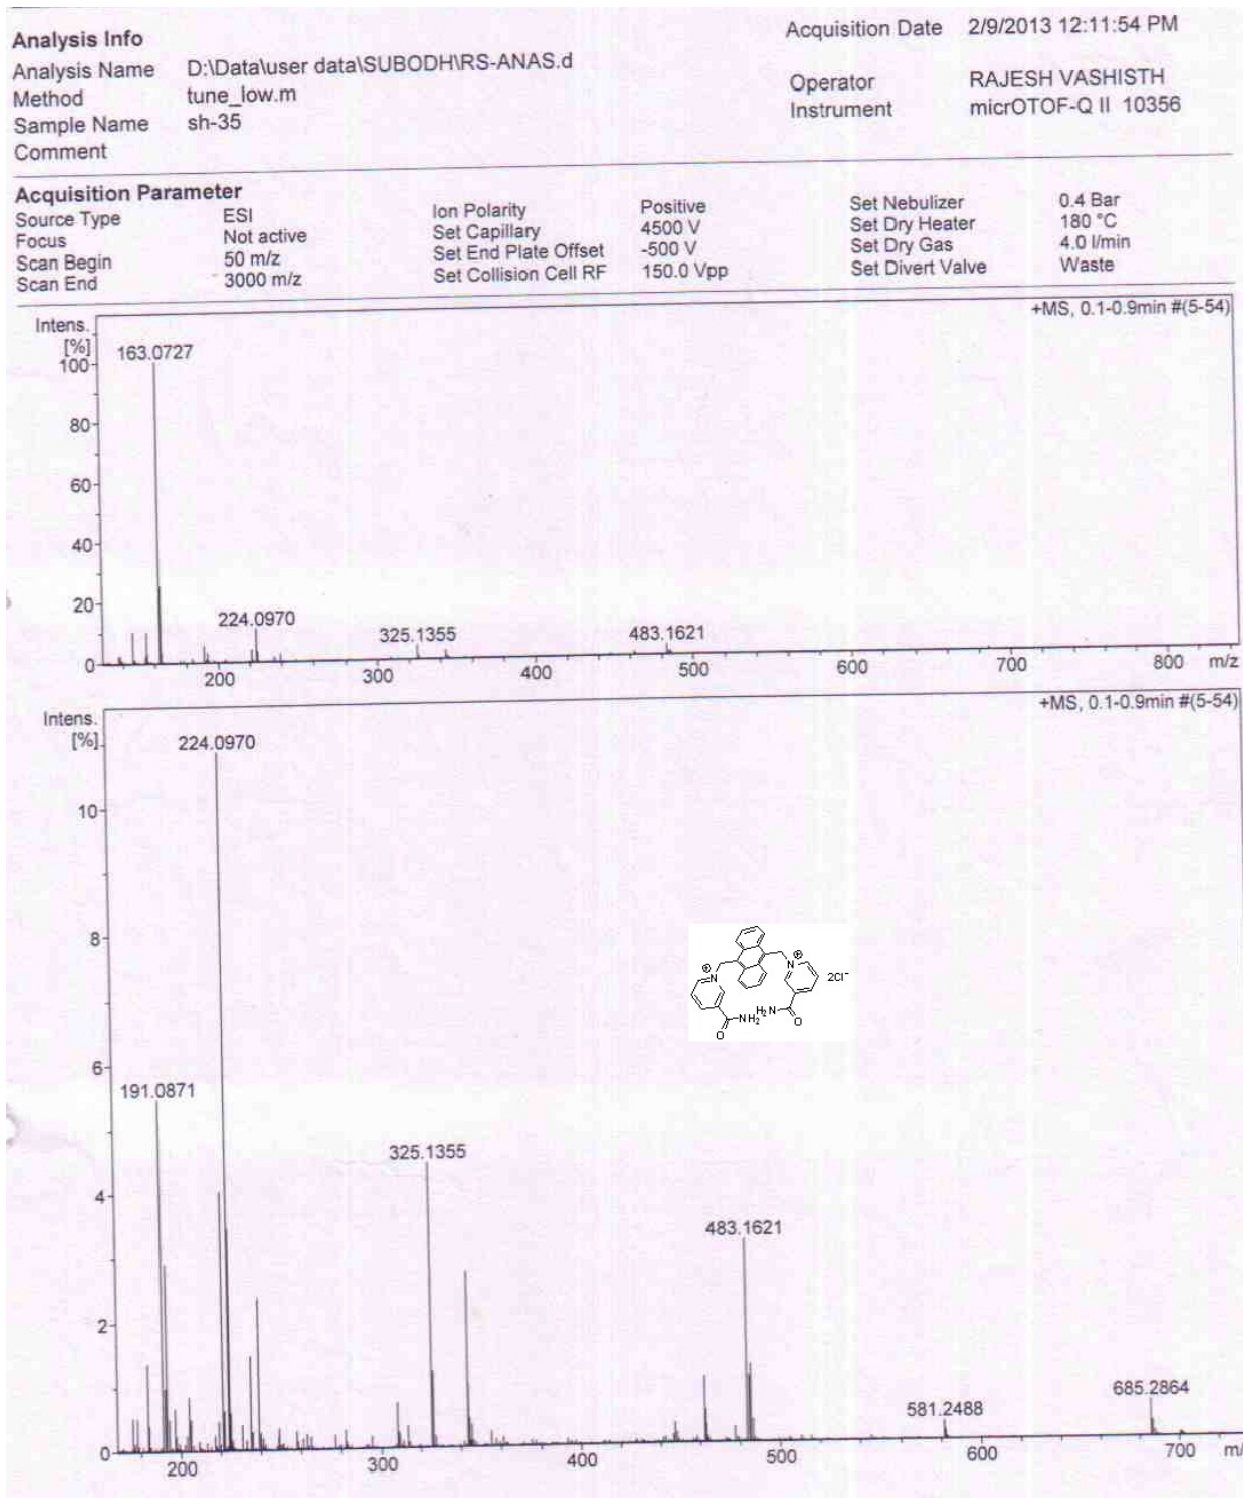

**Figure S5.** HRMS of probe 2

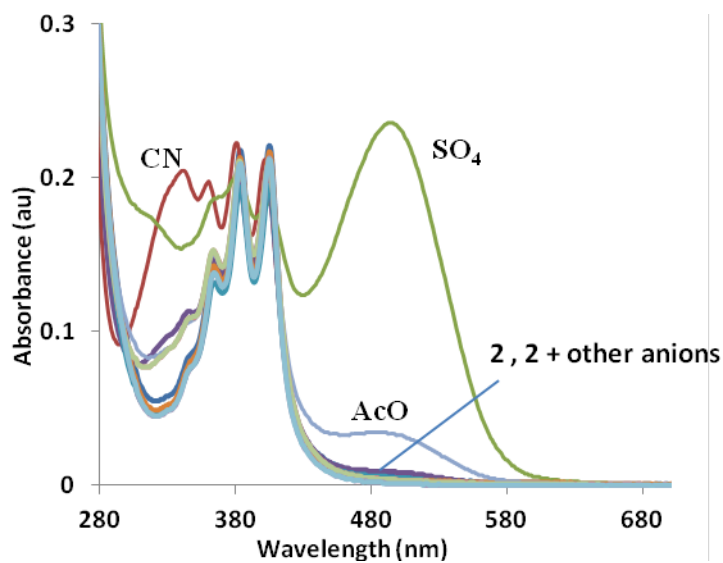

**Figure S6:** The effect of addition of anions on the UV-Vis spectrum of probe **2** (10 μM, DMSO) (SO<sub>4</sub><sup>2-</sup> 50 μM, other anions 200 μM)

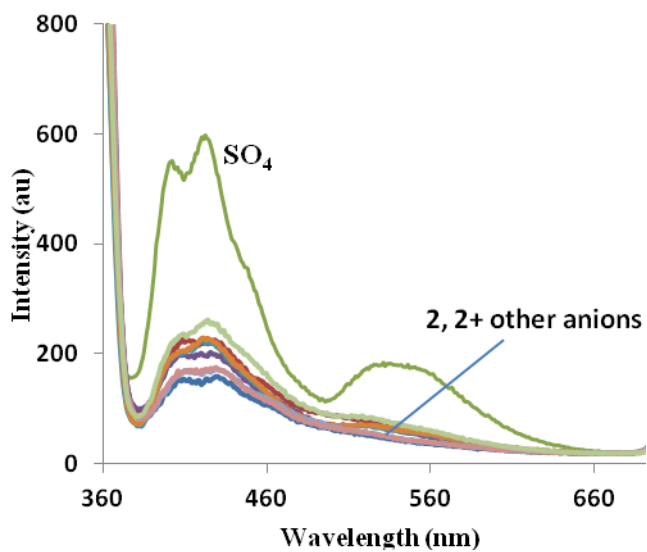

**Figure S7:-** The effect of addition of anions on the fluorescence spectrum of probe **2** (10 μM, DMSO), λ<sub>ex</sub> 360 nm. (SO<sub>4</sub><sup>2-</sup> 50 μM, other anions 200 μM).

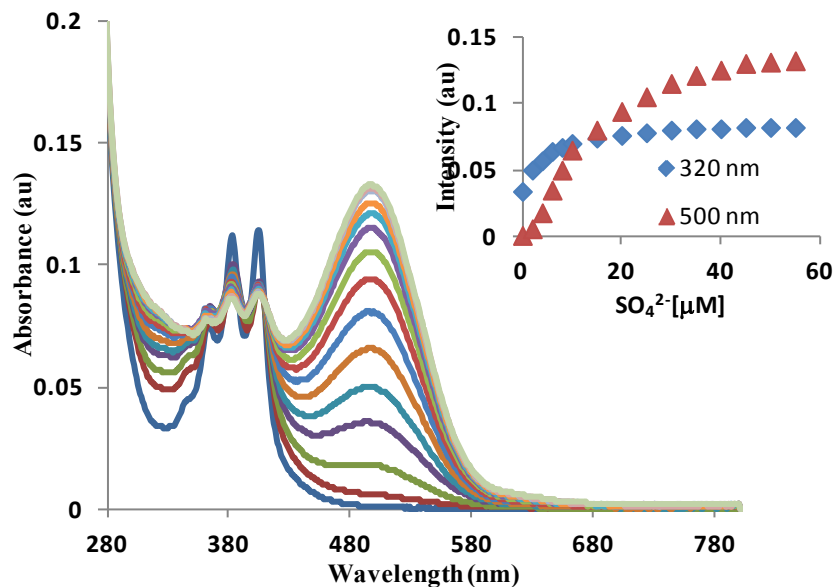

**Figure S8:-** Change in the UV-Vis spectrum of probe 2 (10  $\mu\text{M}$ , DMSO) upon gradual addition of sulfate ions. Inset shows the change in absorbance intensity at 320 nm and 500 nm with concentration of sulfate ions.

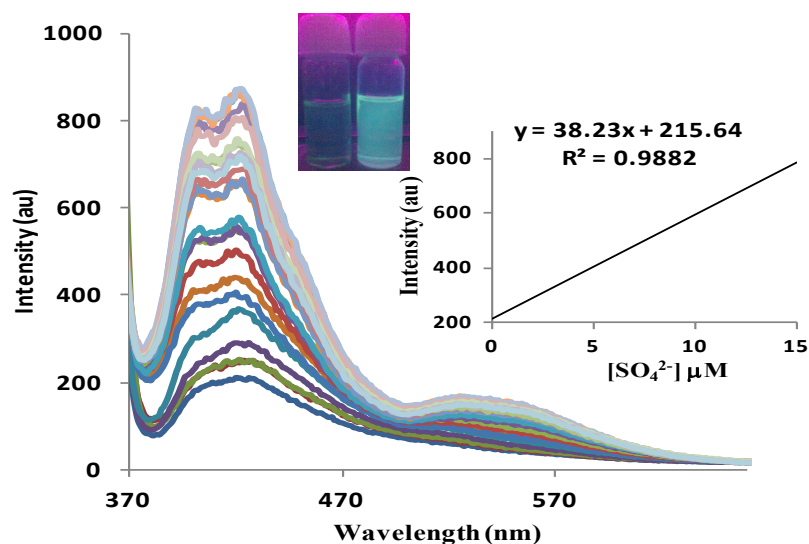

**Figure S9:-** The change in fluorescence spectrum of probe 1 (10  $\mu\text{M}$ , DMSO) upon gradual addition of sulfate ions. Inset shows the linear increase in fluorescence at 421 nm between 0-15  $\mu\text{M}$  of sulfate ions and the fluorescence color change under illumination at 365 nm.



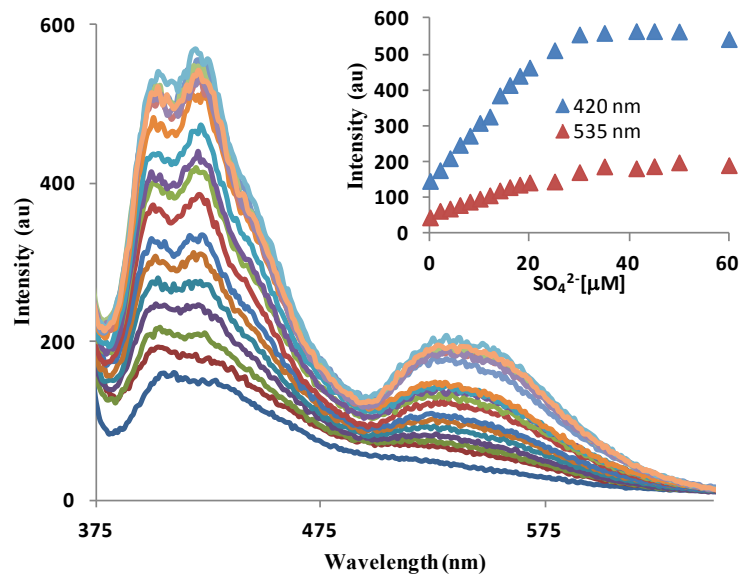

**Figure S10**:- Change in the fluorescence spectrum of probe **2** (10 μM, DMSO) upon gradual addition of sulfate ions,  $\lambda_{\text{ex}} = 360$  nm. Inset shows the change in fluorescence intensity at 420 nm and 535 nm with concentration of sulfate ions.

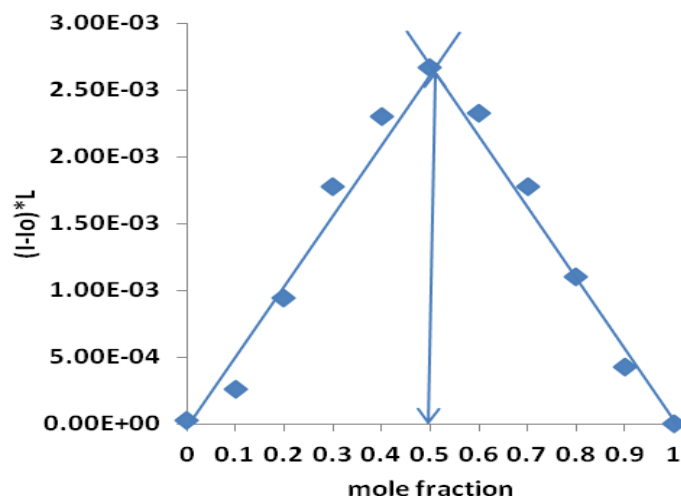

**Figure S11**: Job's plot points towards 1:1 stoichiometry between probe **1** and sulfate ions in DMSO as determined by fluorescence studies

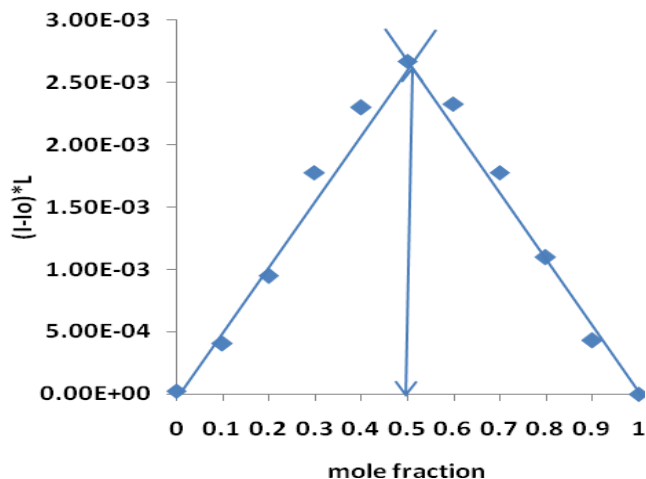

**Figure S12.** Job's plot pointing towards 1:1 stoichiometry between probe **2** and sulfate ions in DMSO as determined by fluorescence studies

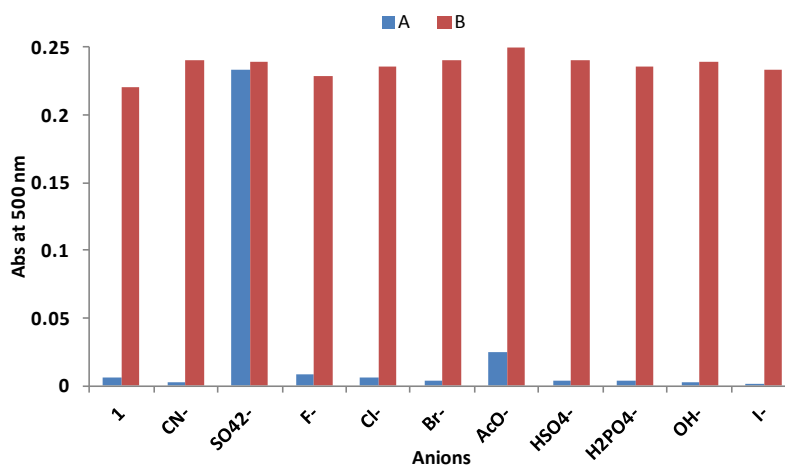

**Figure S13.** Absorbance response of **1** (10  $\mu$ M, DMSO) towards various anions (50  $\mu$ M each). Red bars represent selectivity (Abs at 500 nm) of **1** upon addition of different anions; blue bars represent competitive selectivity of **1** towards sulfate ions (50  $\mu$ M) in the presence of other anions (200  $\mu$ M).

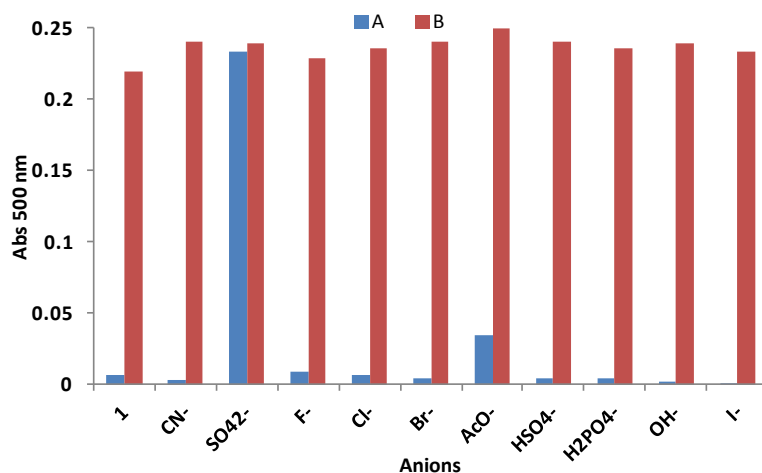

**Figure S14.** Absorbance response of **2** (10  $\mu$ M, DMSO) towards various anions (50  $\mu$ M each). Red bars represent selectivity (Abs at 500 nm) of **2** upon addition of different anions; blue bars represent competitive selectivity of **2** toward sulfate ions (50  $\mu$ M) in the presence of other anions (50  $\mu$ M).

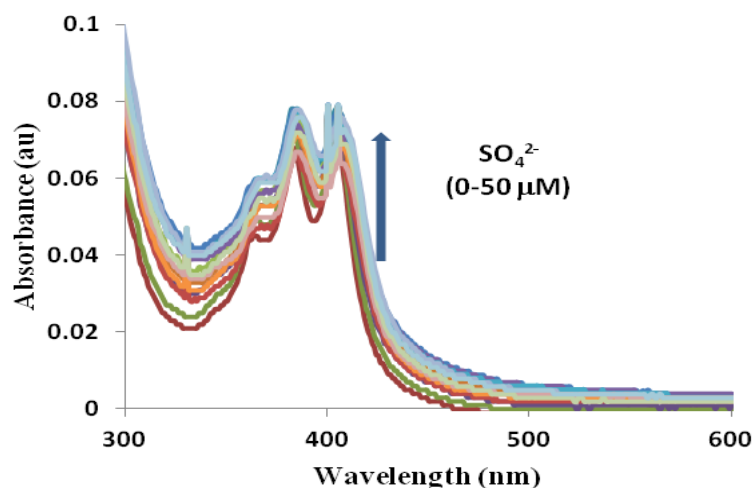

**Figure S15:** Effect of gradual addition of sodium sulfate on the UV-Vis spectrum of probe **1** (10  $\mu$ M, HEPES buffer-DMSO; 9:1, pH = 7.4).

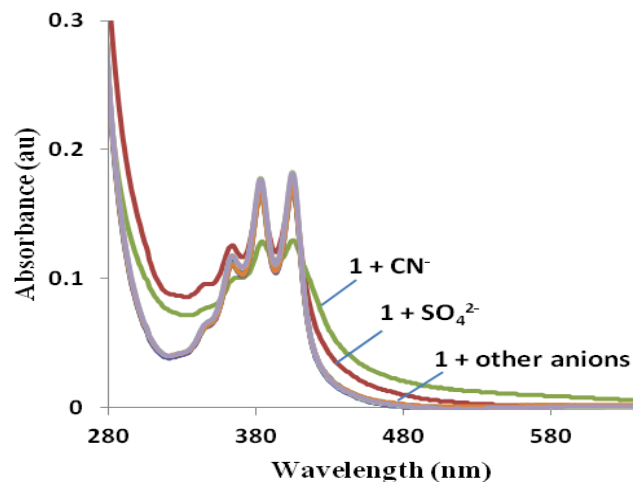

**Figure S16.** Effect of anions on the UV-Vis spectrum of probe **1** (10 μM, HEPES buffer – DMSO; 9:1, pH = 7.4).

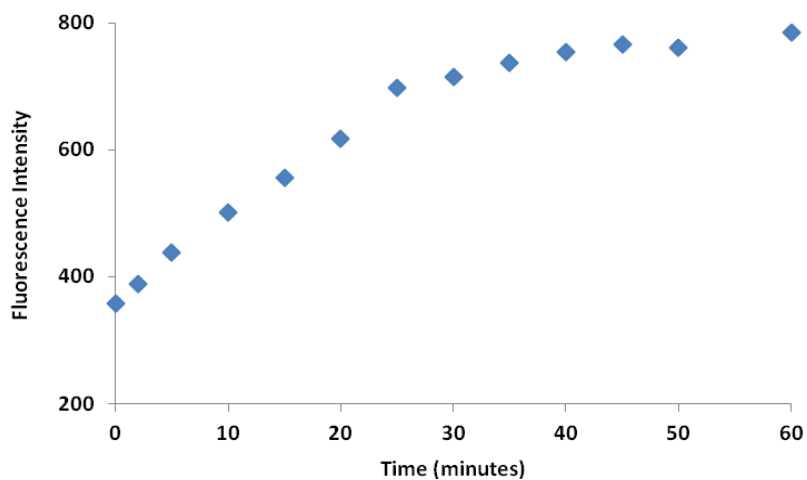

**Figure S17:-** Kinetic studies of the **1**-SO<sub>4</sub><sup>2-</sup> (5 eq.) solution showed the completion of the fluorescence enhancement within 30 minutes.

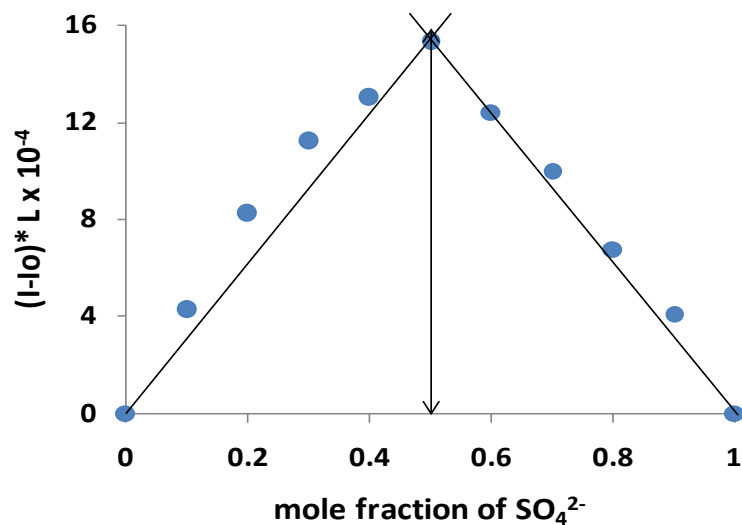

**Figure S18:** Job's plot pointing to 1:1 stoichiometry between probe **1** and sulfate ions.

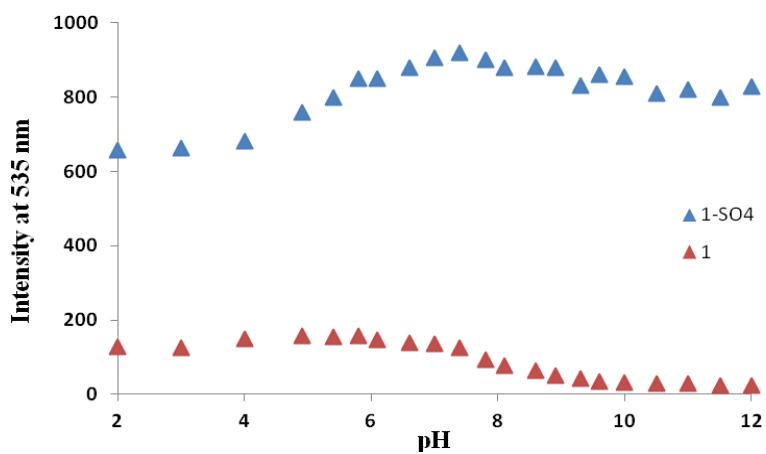

**Figure S19-** The effect of pH on the fluorescence intensity at 535 nm of both probe **1** and its complex with sulfate ions in 90 % aqueous-DMSO solution.

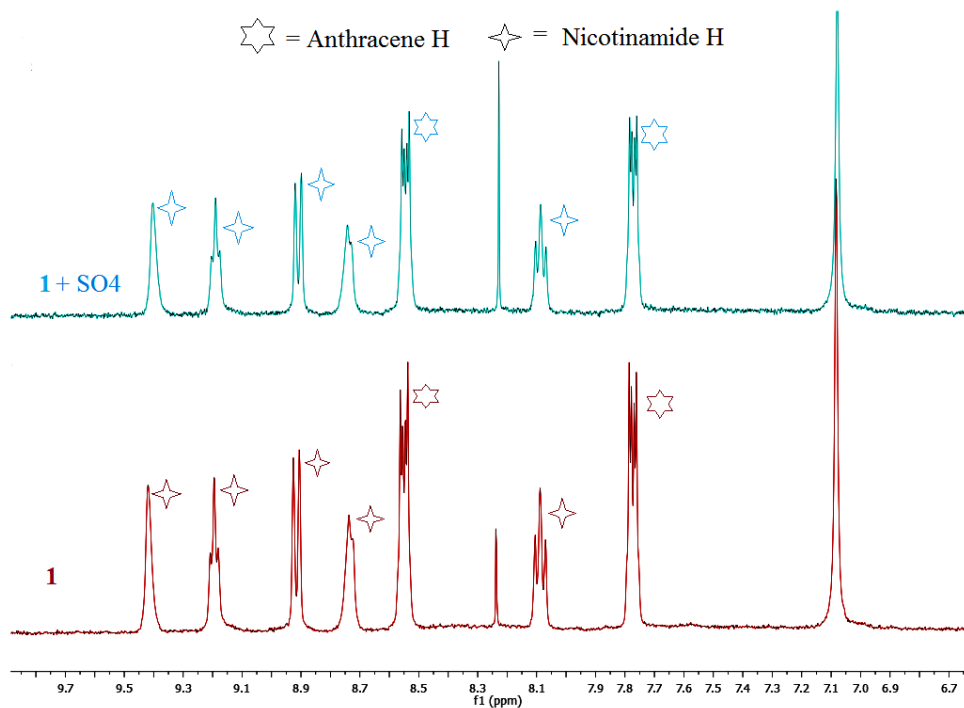

**Figure S20.**  $^1\text{H}$  NMR spectrum of probe **1** before and after the addition of 1 eq. of  $\text{Na}_2\text{SO}_4$  in DMSO- $d_6$ - $\text{H}_2\text{O}$  (8:2).

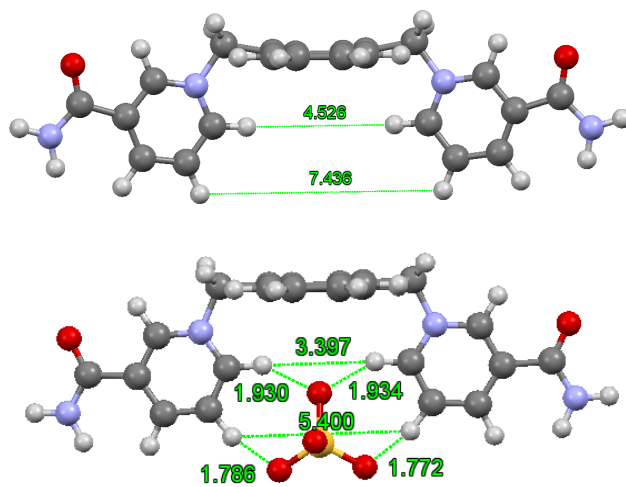

**Figure S21.** The optimized structures of probe **2** and its complex with sulfate ion at B3LYP-3-21G\* level.
